# Supplementary material for: Characterization of Zanthoxylum rhoifolium (Sapindales: Rutaceae) Essential Oil Nanospheres and Insecticidal Effects to Bemisia tabaci (Sternorrhyncha: Aleyrodidae)
Source: MDPI journal article supplement (doi:10.3390/plants11091135), 2022-04-22
Supplement: s1 [file s1]

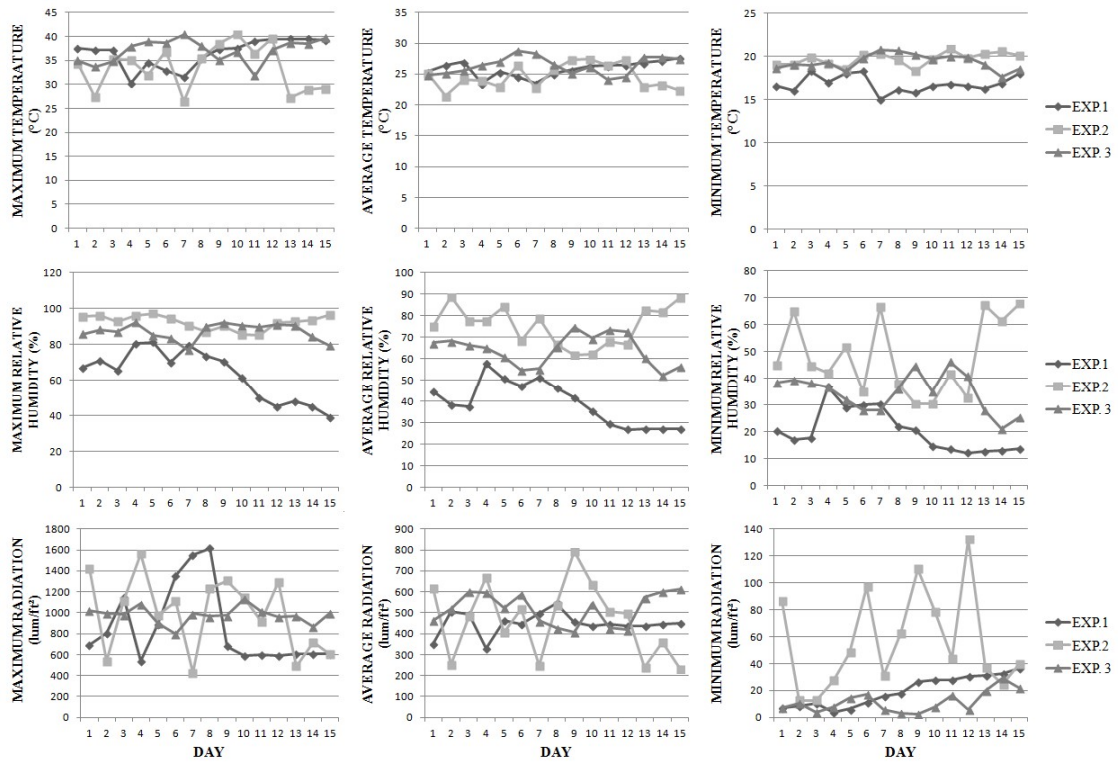

**Figure S1.** Temperature (°C), relative air humidity (%) and light radiation (lumens/ft<sup>2</sup>) recorded at screenhouse for experiments 1, 2 and 3.
